# Supplementary material for: Diagnostic Models for Screening of Chronic Periodontitis with Cytokines and Microbiologic Profiles in Saliva
Source: Preprints.org preprint supplement (doi:10.20944/preprints202009.0054.v1), 2020-09-03
Supplement: Supplementary file 3 [file supplementary]

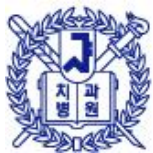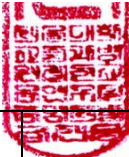

# 서울대학교치과병원 연구윤리심의위원회

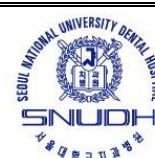

## 심 의 결 과 통 보 서

|                                                                                                                                                          |                                                                                                                                                                       |                                                                             |                                            |
|----------------------------------------------------------------------------------------------------------------------------------------------------------|-----------------------------------------------------------------------------------------------------------------------------------------------------------------------|-----------------------------------------------------------------------------|--------------------------------------------|
| IRB No.                                                                                                                                                  | CRI19004                                                                                                                                                              | 접 수 번 호                                                                     | IRB051/04-19                               |
| 연 구 제 목                                                                                                                                                  | 타액 내 바이오마커 및 구강 미생물 분석법을 이용한 만성 치주염 진단                                                                                                                                |                                                                             |                                            |
| 연구예정기간                                                                                                                                                   | 2019 년 04월 04일 - 2020 년 04월 03일                                                                                                                                       |                                                                             |                                            |
| IRB 승인기간                                                                                                                                                 | 2019 년 04월 04일 - 2020 년 04월 03일                                                                                                                                       |                                                                             |                                            |
| 연 구 책 임 자                                                                                                                                                | 소 속                                                                                                                                                                   | 직 명                                                                         | 성 명 구 기 태                                  |
| 지 원 기 관                                                                                                                                                  | <input type="checkbox"/> 없음 <input checked="" type="checkbox"/> 있음 (산업통상자원부)                                                                                          |                                                                             |                                            |
| 심 의 종 류                                                                                                                                                  | <input type="checkbox"/> 인간대상연구                                                                                                                                       | <input type="checkbox"/> 물리적 개입                                             | <input type="checkbox"/> 상호작용              |
|                                                                                                                                                          | <input checked="" type="checkbox"/> 인체유래물연구                                                                                                                           | <input type="checkbox"/> 보관된 검체                                             | <input checked="" type="checkbox"/> 수집할 검체 |
|                                                                                                                                                          | <input type="checkbox"/> 임상시험                                                                                                                                         | <input type="checkbox"/> 의약품                                                | <input type="checkbox"/> 의료기기              |
|                                                                                                                                                          | <input type="checkbox"/> 기타연구                                                                                                                                         | <input type="checkbox"/>                                                    | <input type="checkbox"/>                   |
| 심 의 일 자                                                                                                                                                  | 2019 년 4 월 4 일 (정규/신속 제 12 차)                                                                                                                                         |                                                                             | 결 과 통 보 일 2019 년 4 월 4 일                   |
| 심 의 구 분                                                                                                                                                  | <input type="checkbox"/> 최초심의                                                                                                                                         | <input checked="" type="checkbox"/> 시정심의                                    | <input type="checkbox"/> 보완심의              |
|                                                                                                                                                          | <input type="checkbox"/> 지속심의                                                                                                                                         | <input type="checkbox"/> 종료보고                                               | <input type="checkbox"/> 기타                |
| 심 의 대 상                                                                                                                                                  | Version No.                                                                                                                                                           | 심 의 대 상                                                                     |                                            |
| <input checked="" type="checkbox"/> 연구계획서                                                                                                                | Version 1.1                                                                                                                                                           | <input type="checkbox"/> 모니터링자료<br><input type="checkbox"/> 기타(Version No.) | <input type="checkbox"/> 서명 받은 동의서         |
| <input checked="" type="checkbox"/> 동의서 및 설명서                                                                                                            | Version 1.1<br>(인체유래물 연구 동의서)                                                                                                                                         |                                                                             | <input type="checkbox"/> 완성된 증례기록서         |
| <input type="checkbox"/> 동의 면제 사유서                                                                                                                       |                                                                                                                                                                       |                                                                             |                                            |
| <input checked="" type="checkbox"/> 증례기록서                                                                                                                | Version 1.1                                                                                                                                                           |                                                                             |                                            |
| <input type="checkbox"/> 연구자 이력서                                                                                                                         |                                                                                                                                                                       |                                                                             |                                            |
| 심 의 결 과                                                                                                                                                  | <input checked="" type="checkbox"/> 승인 <input type="checkbox"/> 시정승인 <input type="checkbox"/> 보완 <input type="checkbox"/> 부결 <input type="checkbox"/> 승인취소 (중지 또는 보류) |                                                                             |                                            |
| 심 의 의 견                                                                                                                                                  | 제 12 차 IRB 신속심의결과 시정심의에 대하여 승인되었습니다.                                                                                                                                  |                                                                             |                                            |
| 지속심의주기                                                                                                                                                   | 12 개월                                                                                                                                                                 | 지속심의 제출기한                                                                   | 해당없음                                       |
| 1. 심의결과에 대한 이의의 제기가 필요한 경우에는 이의 사유와 근거자료를 첨부하여 심의일로부터 1 개월 이내에 심의위원회에 재심을 청구할 수 있다.<br>2. 연구계획서의 수정 또는 자료 보완 등이 요구된 경우, 근거자료를 첨부하여 1 년 이내에 심의를 청구할 수 있다. |                                                                                                                                                                       |                                                                             |                                            |

## 연구윤리심의위원회 위원장

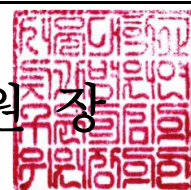

## 서울대학교치과병원 연구윤리심의위원회

### 본 위원회에서 승인된 모든 연구에 대하여 아래의 사항을 준수하여야 합니다.

1. IRB-SOP에 따라 사람을 대상으로 하는 모든 연구는 위원회의 승인을 득한다.
2. 승인된 연구계획서에 따라 연구를 수행한다.
3. IRB의 승인을 받은(유효일이 표기) 설명문 및 동의서를 사용하고, 그 사본을 서명한 연구대상자에게 제공하여야 한다. (인체유래물연구는 법정 서식을 따른다.)
4. 모국어가 한국어와 다른 연구대상자인 경우 연구대상자의 모국어 번역본을 사용하고, 번역본 역시 IRB 승인을 득한다.
5. 연구진행에 있어 연구대상자를 보호하기 위해 불가피한 경우를 제외하고 연구의 어떠한 변경이든 위원회의 사전 승인을 받고 수행하여야 하며 연구대상자들의 보호를 위해 취해진 어떠한 응급상황에서의 변경도 즉각 위원회에 보고한다.
6. 승인된 계획서에 따라 연구진행 시 등록된 모든 연구대상자의 사망, 입원, 심각한 질병 등에 대하여 위원회에 서면으로 신속히 보고하여야 한다.
7. 임상시험 또는 연구대상자의 안전에 대해 유해한 영향을 미칠 수 있는 어떠한 새로운 정보도 즉각적으로 위원회에 보고하여야 한다.
8. 연구 중 예기치 못한 이상반응이나 부작용은 즉각 위원회에 보고하여야 한다.
9. 위원회의 요구가 있을 때에는 연구의 진행과 관련된 보고를 위원회에 제출한다.
10. 연구대상자 모집광고는 위원회의 승인 후 공고한다.
11. 동의는 강제 혹은 부당한 영향력이 없는 상태에서 충분한 설명에 근거하여 수행하며, 잠재적인 연구대상자에게 연구에의 참여여부를 고려할 수 있도록 충분히 기회를 제공한다.
12. 연구자와 그밖에 이해당사자는 연구계획서 승인을 광고나 홍보, 상업적 목적으로 사용하지 않는다.
13. 시정·보완 요구에 대해 모두 충족될 경우에만 연구를 진행한다(심의일로부터 1년 이내에 시정·보완 계획을 제출하지 않은 경우 심의가 무효화될 수 있습니다.).
14. 연구승인기간 연장을 위해 승인 만료 전까지 연구의 진행상황에 대하여 중간보고(지속심의)를 제출한다.
15. 인체유래물 폐기 시에 연구자는 폐기일시, 폐기량, 폐기 방법 등 폐기에 관한 기록을 폐기일로부터 5년간 보관한다.
16. 상기의 사항 이외의 세부 사항은 정부기관 및 소속기관의 관련 규정에 의하여 진행한다.

## 연구윤리심의위원회
